# Supplementary material for: Nanobiochar: production, properties, and multifunctional applications
Source: Royal Society of Chemistry journal article supplement (doi:10.1039/d0en00486c), 2020-01-01
Supplement: d0en00486c1.pdf [file d0en00486c1.pdf]

## Supplementary Data

### **Nanobiochar: Production, Properties, and Multifunctional Applications**

Sammani Ramanayaka<sup>1</sup>, Meththika Vithanage<sup>1,\*</sup>, Daniel S. Alessi<sup>2</sup>, Wu-Jun Liu<sup>3</sup>, Anil C.A. Jayasundera<sup>4</sup>, Yong Sik Ok<sup>5,\*</sup>

<sup>1</sup>Ecosphere Resilience Research Center, Faculty of Applied Sciences, University of Sri Jayewardenepura, Nugegoda, Sri Lanka

<sup>2</sup>Department of Earth and Atmospheric Sciences, University of Alberta, Edmonton, Alberta T6G 2E3, Canada

<sup>3</sup>CAS Key Laboratory of Urban Pollutant Conversion, Department of Applied Chemistry, University of Science & Technology of China, Hefei, 230026, China

<sup>4</sup>Department of Chemistry, University of Peradeniya, Peradeniya, Sri Lanka

<sup>5</sup>Korea Biochar Research Center, APRU Sustainable Waste Management & Division of Environmental Science and Ecological Engineering, Korea University, Seoul 02841, South Korea

Table S1. Basic operation parameters and estimated methods capital costs (The appropriate values should be used depending on the country and production method of biochar and nanobiochar) <sup>1</sup>

| Description                                                                                                 | Method I<br>(Milling and nano<br>fraction extraction)                    | Method II<br>(Microwave pyrolysis)                                       | Method III<br>(Thermal-flash<br>exfoliation)                             |
|-------------------------------------------------------------------------------------------------------------|--------------------------------------------------------------------------|--------------------------------------------------------------------------|--------------------------------------------------------------------------|
| <b>Operating parameters</b>                                                                                 |                                                                          |                                                                          |                                                                          |
| Operating time per day                                                                                      | Daily operating time                                                     | Daily operating time                                                     | Daily operating time                                                     |
| Annual operating time                                                                                       | Operating time/day x no.<br>of working days/year                         | Operating time/day x no.<br>of working days/year                         | Operating time/day x no.<br>of working days/year                         |
| Process time (including<br>preparation time, reaction time,<br>cooling down process, collecting<br>product) | Total time to take ground<br>biochar and separate the<br>nano fraction   | Total time to take<br>microwave pyrolyzed<br>nanobiochar                 | Total time to take<br>microwave pyrolyzed<br>nanobiochar                 |
| Amount of feedstock                                                                                         | Feedstock (Kg) needed to<br>obtain the specific weight<br>of nanobiochar | Feedstock (Kg) needed to<br>obtain the specific weight<br>of nanobiochar | Feedstock (Kg) needed to<br>obtain the specific weight<br>of nanobiochar |
| <b>Measurement of capital cost</b>                                                                          |                                                                          |                                                                          |                                                                          |
| Fixed Capital Investment (FCI) <sup>2</sup>                                                                 | <sup>a</sup> (Y <sub>1</sub> USD x 1.1) + (X <sub>1</sub><br>USD x 1.3)  | <sup>b</sup> (Y <sub>2</sub> USD x 1.1) + (X <sub>2</sub><br>USD x 1.3)  | <sup>c</sup> (Y <sub>3</sub> USD x 1.1) + (X <sub>3</sub><br>USD x 1.3)  |
| Total plant cost (TPC) <sup>2</sup>                                                                         | <sup>d</sup> Sum of FCI + 15% FCI                                        | <sup>e</sup> Sum of FCI + 15% FCI                                        | <sup>f</sup> Sum of FCI + 15% FCI                                        |
| <b>Measurement of operating cost</b>                                                                        |                                                                          |                                                                          |                                                                          |
| Feedstock                                                                                                   | Amount of feedstock/day<br>x working days                                | Amount of feedstock/day<br>x working days                                | Amount of feedstock/day<br>x working days                                |

|                                     |                                                          |                                                          |                                                          |
|-------------------------------------|----------------------------------------------------------|----------------------------------------------------------|----------------------------------------------------------|
| Electricity                         | (Z <sub>1</sub> USD/kWh x operating time x working days) | (Z <sub>2</sub> USD/kWh x operating time x working days) | (Z <sub>3</sub> USD/kWh x operating time x working days) |
| Maintenance                         | 3% of FCI                                                | 3% of FCI                                                |                                                          |
| Labour cost                         | (m <sub>1</sub> USD/h x operating time x working days)   | (m <sub>2</sub> USD/h x operating time x working days)   | (m <sub>3</sub> USD/h x operating time x working days)   |
| <b>Production cost</b> <sup>3</sup> |                                                          |                                                          |                                                          |
|                                     | Annual operating cost/Annual production cost             | Annual operating cost/Annual production cost             | Annual operating cost/Annual production cost             |

- a. FCI for scaled-up system (Method I): The sum of the total equipment cost multiply with a direct factor of 1.1 (USD × 1.1), added to the total cost of design, installation, fabrication and modification on the system and multiply by an indirect factor of 1.3 (USD × 1.3)
- b. FCI for scaled-up system (Method II): The sum of the total equipment cost multiply with a direct factor of 1.1 (USD × 1.1), added to the total cost of design, installation, fabrication and modification on the system and multiply by an indirect factor of 1.3 (USD × 1.3)
- c. FCI for scaled-up system (Method III): The sum of the total equipment cost multiply with a direct factor of 1.1 (USD × 1.1), added to the total cost of design, installation, fabrication and modification on the system and multiply by an indirect factor of 1.3 (USD × 1.3)
- d. FCI + 15% of FCI of scaled-up system of nanobiochar (method I)
- e. FCI + 15% of FCI of scaled-up system of nanobiochar (method II)
- f. FCI + 15% of FCI of scaled-up system of nanobiochar (method III)

X<sub>1</sub>, X<sub>2</sub>, X<sub>3</sub>. Equipment cost\*

$Y_1, Y_2, Y_3$ . The sum of the total equipment cost\*

$z_1, z_2, z_3$ . Total cost for kilo watt per hour\*

$m_1, m_2, m_3$ . Labor cost per hour\*

\* Values depends on the country and the method

## References

1. Lam, S. S. *et al.* Microwave vacuum pyrolysis of waste plastic and used cooking oil for simultaneous waste reduction and sustainable energy conversion: Recovery of cleaner liquid fuel and techno-economic analysis. *Renew. Sustain. Energy Rev.* **115**, 109359 (2019).
2. Islam, M. N. & Ani, F. N. Techno-economics of rice husk pyrolysis, conversion with catalytic treatment to produce liquid fuel. *Bioresour. Technol.* **73**, 67–75 (2000).
3. Liew, R. K. *et al.* Innovative production of highly porous carbon for industrial effluent remediation via microwave vacuum pyrolysis plus sodium-potassium hydroxide mixture activation. *J. Clean. Prod.* **208**, 1436–1445 (2019).
